# Supplementary material for: Benthic Foraminifera and Productivity Regimes in the Kveithola Trough (Barents Sea)—Ecological Implications in a Changing Arctic and Actuopaleontological Meaning
Source: MDPI journal article supplement (doi:10.3390/jmse11020237), 2023-01-17
Supplement: s1 [file s1]

# Taxonomic list

## Polythalamous Calcareous Taxa

|                                                          |                                                             |
|----------------------------------------------------------|-------------------------------------------------------------|
| <i>Alabaminella weddellensis</i> (Earland, 1936)         | <i>Lagena</i> Walker & Jacob, 1798                          |
| <i>Astrononion hamadaense</i> Asano, 1950                | <i>Lenticulina</i> Lamarck, 1804                            |
| <i>Bolivina spathulata</i> (Williamson, 1858)            | <i>Lobatula lobatula</i> (Walker & Jacob, 1798)             |
| <i>Bolivinellina pseudopunctata</i> (Höglund, 1947)      | <i>Melonis zaandami</i> (van Voorthuysen, 1952)             |
| <i>Buccella frigida</i> (Cushman, 1922)                  | <i>Nonion</i> Montfort, 1808                                |
| <i>Cassidulina carinata</i> Silvestri, 1896              | <i>Nonionella iridea</i> Heron-Allen & Earland, 1932        |
| <i>Cassidulina reniforme</i> Nørvang, 1945               | <i>Nonionella opima</i> Cushman, 1947                       |
| <i>Cassidulina teretis</i> Tappan, 1951                  | <i>Nonionella stella</i> Cushman & Moyer, 1930              |
| <i>Cibicides refulgens</i> Montfort, 1808                | <i>Nonionellina labradorica</i> (Dawson, 1860)              |
| <i>Cibicidoides pseudoungerianus</i> (Cushman, 1922)     | <i>Oolina borealis</i> Loeblich & Tappan, 1954              |
| <i>Cibicidoides variabilis</i> (d'Orbigny, 1826)         | <i>Patellina corrugata</i> Williamson, 1858                 |
| <i>Criboelphidium excavatum</i> (Terquem, 1875)          | <i>Procerolagena gracilis</i> (Williamson, 1848)            |
| <i>Dentalina</i> Risso, 1826                             | <i>Procerolagena mollis</i> (Cushman, 1944)                 |
| <i>Eubuliminella exilis</i> (Brady, 1884)                | <i>Pullenia bulloides</i> (d'Orbigny, 1846)                 |
| <i>Epistominella arctica</i> Green, 1959                 | <i>Pullenia quinqueloba</i> (Reuss, 1851)                   |
| <i>Fissurina</i> Reuss, 1850                             | <i>Reussoolina laevis</i> (Montagu, 1803)                   |
| <i>Fissurina serrata</i> (Schlumberger, 1894)            | <i>Robertinoides charlottensis</i> (Cushman, 1925)          |
| <i>Globobulimina</i> Cushman, 1927                       | <i>Rosalina bradyi</i> (Cushman, 1915)                      |
| <i>Gyroidina umbonata</i> (Silvestri, 1898)              | <i>Stainforthia fusiformis</i> (Williamson, 1858)           |
| <i>Hyalinonetrion gracillimum</i> (Seguenza, 1862)       | <i>Trifarina angulosa</i> (Williamson, 1858)                |
| <i>Islandiella helenae</i> Feyling-Hanssen & Buzas, 1976 | <i>Trifarina fluens</i> (Todd in Cushman & McCulloch, 1948) |
| <i>Islandiella norcrossi</i> (Cushman, 1933)             |                                                             |

## **Polythalamous Miliolids Taxa**

*Miliolinella subrotunda* (Montagu, 1803)

*Pyrgo oblonga* (d'Orbigny, 1839)

*Quinqueloculina agglutinans* d'Orbigny, 1839

*Quinqueloculina padana* Perconig, 1954

*Quinqueloculina seminula* (Linnaeus, 1758)

*Quinqueloculina* d'Orbigny, 1826

*Triloculina frigida* Lagoe, 1977

*Triloculina oblonga* (Montagu, 1803)

## Polythalamous Agglutinated Taxa

|                                                                |                                                                          |
|----------------------------------------------------------------|--------------------------------------------------------------------------|
| <i>Adercotryma glomeratum</i> (Brady, 1878)                    | <i>Portatrochammina antarctica</i> subsp. <i>antarctica</i> (Parr, 1950) |
| <i>Ammodiscus planorbis</i> Höglund, 1947                      | <i>Paratrochammina simplissima</i> (Cushman & McCulloch, 1948)           |
| <i>Ammodiscus</i> Reuss, 1862                                  | <i>Recurvoides contortus</i> Earland, 1934                               |
| <i>Atlantiella atlantica</i> (Parker, 1952)                    | <i>Reophax bilocularis</i> Flint, 1899                                   |
| <i>Cribrostomoides jeffreysii</i> (Williamson, 1858)           | <i>Reophax fusiformis</i> (Williamson, 1858)                             |
| <i>Cribrostomoides spiculolegus</i> (Parr, 1950)               | <i>Reophax pilulifer</i> Brady, 1884                                     |
| <i>Cuneata arctica</i> (Brady, 1881)                           | <i>Reophax scorpiurus</i> Montfort, 1808                                 |
| <i>Deuterammina rotaliformis</i> (Heron-Allen & Earland, 1911) | <i>Reophax subfusiformis</i> Earland Em. Höglund, 1947                   |
| <i>Eggerella bradyi</i> (Cushman, 1911)                        | <i>Spiroplectammina biformis</i> (Parker & Jones, 1865)                  |
| <i>Eggerella minuta</i> (Wiesner, 1931)                        | <i>Textularia earlandi</i> Parker, 1952                                  |
| <i>Eggerelloides advenus</i> (Cushman, 1922)                   | <i>Textularia torquata</i> Parker, 1952                                  |
| <i>Glomospira</i> Rzehak, 1885                                 | <i>Trochammina</i> Parker & Jones, 1859                                  |
| <i>Hormosinella ovicula</i> (Brady, 1879)                      | <i>Trochammina nana</i> (Brady, 1881)                                    |
| <i>Labrospira crassimargo</i> (Norman, 1892)                   | <i>Trochamminopsis xishaensis</i> (Zheng, 1979)                          |
| <i>Leptohalysis scottii</i> (Chaster, 1892)                    |                                                                          |
| <i>Nodulina dentaliniformis</i> (Brady, 1881)                  |                                                                          |

## **Monothalamous Agglutinated Taxa**

*Hyperammina* Brady, 1878

*Lagenammina* Rhumbler, 1911

*Lagenammina difflugiformis* (Brady, 1879)

*Psammosphaera fusca* Schulze, 1875

*Saccammina* Sars in Carpenter, 1869

*Thurammina* Brady, 1879

*Vanhoeffenella gaussi* Rhumbler, 1905

## Monothalamous Soft-shelled Taxa

|                                                              |                                                   |
|--------------------------------------------------------------|---------------------------------------------------|
| <i>Allogromiid</i> sp. 3                                     | <i>Hippocrepina indivisa</i> Parker, 1870         |
| <i>Allogromiid</i> sp. 6                                     | <i>Micrometula hyalostrata</i> -like              |
| <i>Allogromiid</i> sp. 7                                     | <i>Micrometula</i> sp.                            |
| <i>Allogromiid</i> sp. 9                                     | <i>Pelosina</i> Brady, 1879                       |
| <i>Allogromiid</i> sp. 13                                    | <i>Placopsilinella</i> Earland, 1934              |
| <i>Allogromiid</i> sp. 35                                    | <i>Psammophaga</i> sp.                            |
| <i>Allogromiid</i> sp. B                                     | <i>Psammophaga</i> sp. 1                          |
| <i>Allogromiid</i> sp. G                                     | <i>Psammophaga</i> sp.                            |
| <i>Allogromiid</i> sp. I-1                                   | <i>Psammophaga crystallifera</i> (Dahlgren, 1962) |
| <i>Allogromiid</i> sp. I-2                                   | <i>Saccamminid</i> sp. 1 (silver)                 |
| <i>Allogromiid</i> squatter (Benthic)                        | <i>Saccamminid</i> sp. 2 (white dull)             |
| <i>Allogromiid</i> squatter (Planktonic)                     | <i>Saccamminid</i> sp. 4-bis                      |
| <i>Bowseria</i> Sinniger, Lecroq, Majewski & Pawlowski, 2008 | <i>Saccamminid</i> sp. 5                          |
| <i>Capsammina patelliformis</i> -like                        | <i>Saccamminid</i> sp. 6                          |
| <i>Cylindrogullmia</i> sp.                                   | <i>Saccamminid</i> sp. 12                         |
| <i>Conqueria laevis</i> Gooday & Pawlowski, 2004             | <i>Saccamminid</i> sp. A/C                        |
| Elongated <i>Allogromiid</i>                                 | <i>Saccamminid</i> sp. I-1                        |
| Encased <i>Allogromiid</i>                                   | <i>Psammosphaerid</i> sp. 3                       |
| <i>Globopelorhiza</i> -like                                  | <i>Psammosphaerid</i> sp. C                       |
| <i>Gloiogullmia</i> sp.                                      | <i>Psammosphaerid</i> sp. I-1                     |
|                                                              | <i>Tinogullmia</i> sp.                            |
